# Supplementary material
Source: Royal Society of Chemistry journal article supplement (doi:10.1039/d6ta03497g)
Supplement: d6ta03497g1.pdf [file d6ta03497g1.pdf]

## Supporting Information for

### Interfacial Linkages Enhance Redox-Adaptive Bifunctional Catalysis of Heterostructured Catalysts

*Yu-Xinag Lin,<sup>a</sup> Yu-Chieh Ting,<sup>a</sup> Chiung-Wen Chang,<sup>a</sup> Shao-I Chang,<sup>a</sup> Kai-An Lee,<sup>a</sup> Tsung-Wei Hsueh,<sup>a</sup>  
Chia-Hsien Lin,<sup>a</sup> Shih-Yuan Lu<sup>a\*</sup>*

***Affiliations:***

Department of Chemical Engineering, National Tsing Hua University, Hsinchu 300044, Taiwan.

**\*Email:** [sylu@mx.nthu.edu.tw](mailto:sylu@mx.nthu.edu.tw) (Shih-Yuan Lu)

**Keywords:** Water Electrolysis, Layered Double Hydroxide, Oxygen Bridged Interfacial Linkage,  
Heterostructured Catalyst, Bifunctional Catalyst

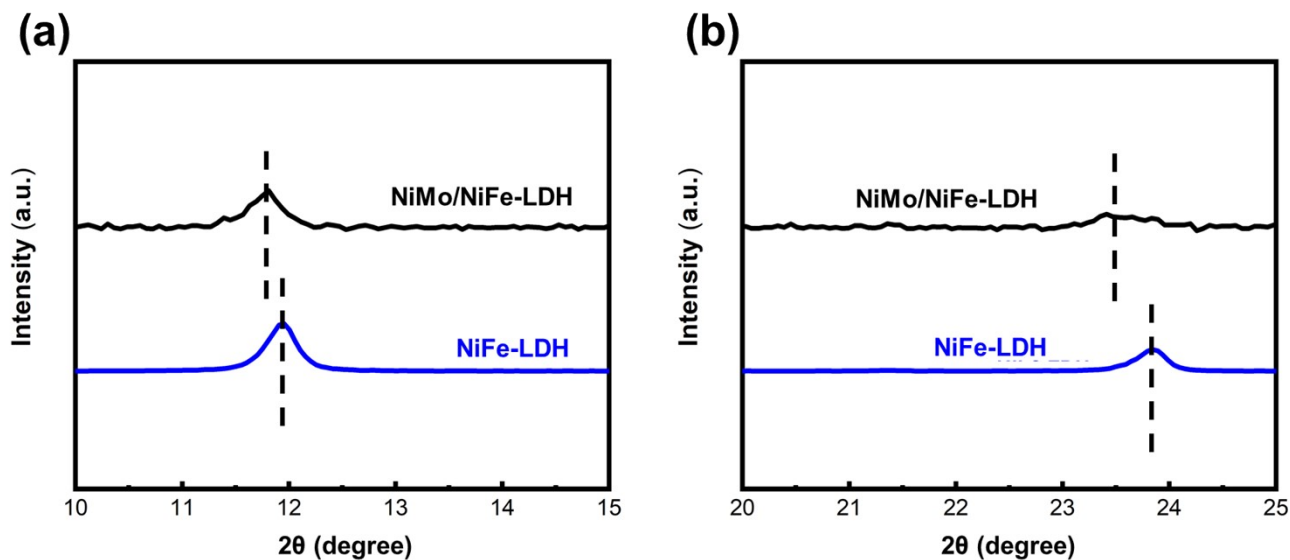

**Figure S1.** Locally enlarged diffraction peaks of (a) (003) and (b) (006) of NiMo/NiFe-LDH and NiFe-LDH for comparison.

**Table S1.** Elemental compositions of NiFe-LDH, NiMo, and NiMo/NiFe-LDH determined with ICP-OES.

| Sample        | Ni (at%) | Fe (at%) | Mo (at%) |
|---------------|----------|----------|----------|
| NiFe-LDH      | 65.23    | 34.77    | 0        |
| NiMo          | 60.66    | 0        | 39.34    |
| NiMo/NiFe-LDH | 66.69    | 32.1     | 1.21     |

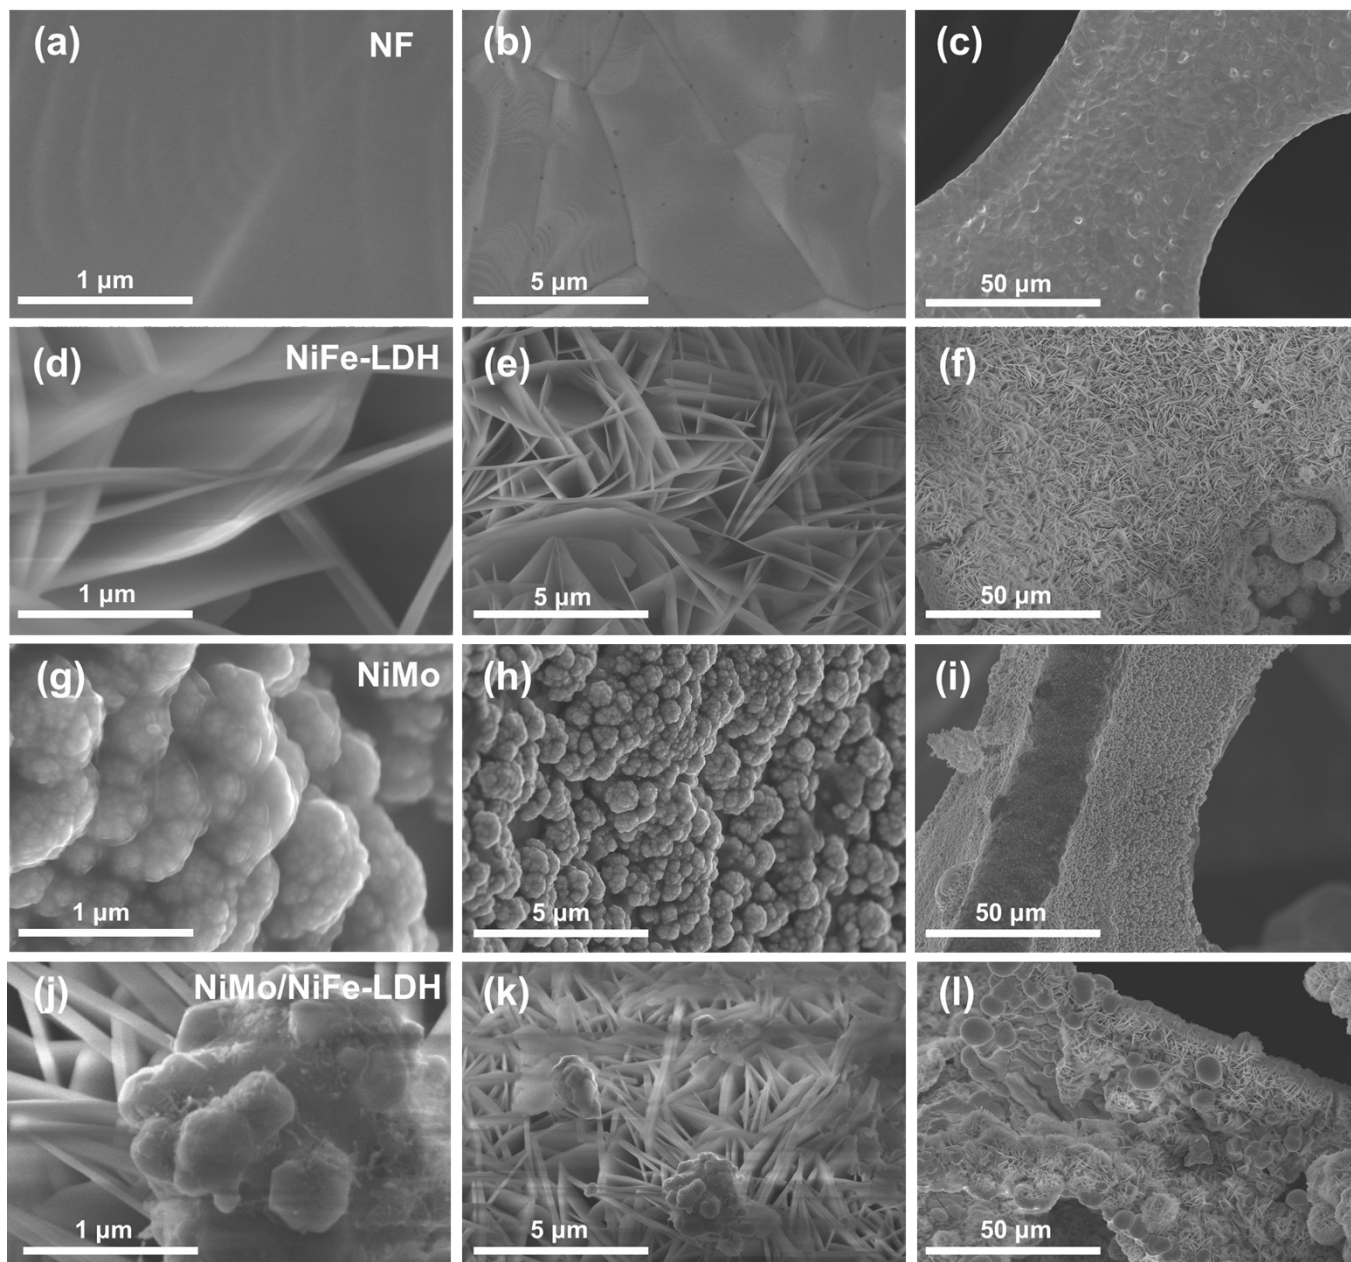

**Figure S2.** SEM images of (a-c) NF, (d-f) NiFe-LDH on NF, (g-i) NiMo on NF, and (j-l) NiMo/NiFe-LDH on NF at decreasing magnifications.

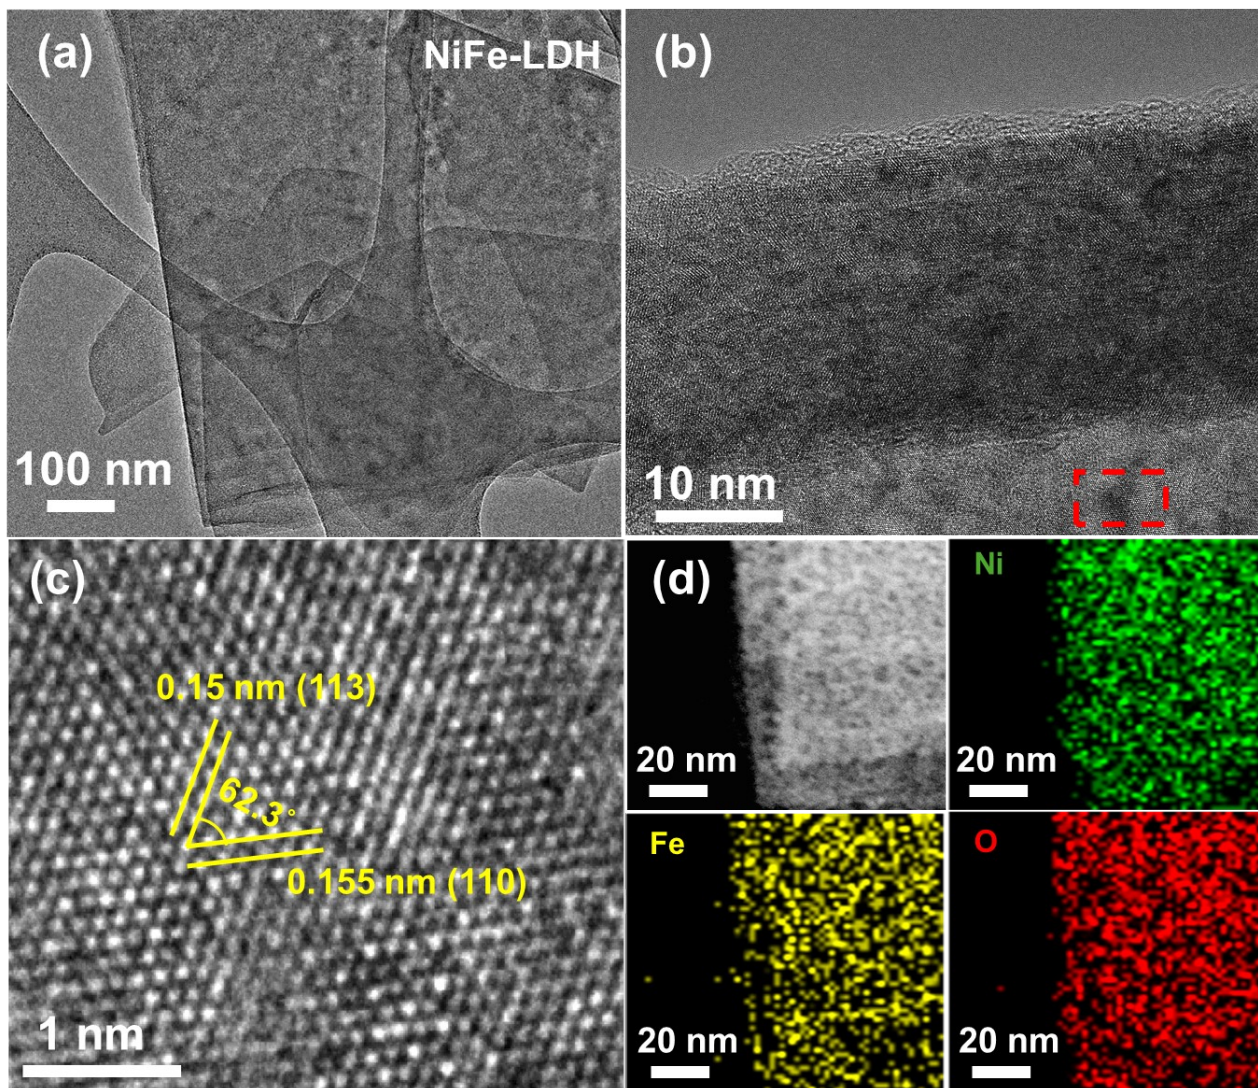

**Figure S3.** (a) TEM image of NiFe-LDH. (b) HRTEM image of NiFe-LDH. (c) Locally enlarged HRTEM image of NiFe-LDH with exposed facets designated. (d) HAADF-STEM image of NiFe-LDH with corresponding EDS elemental mapping of Ni, Fe, and O.

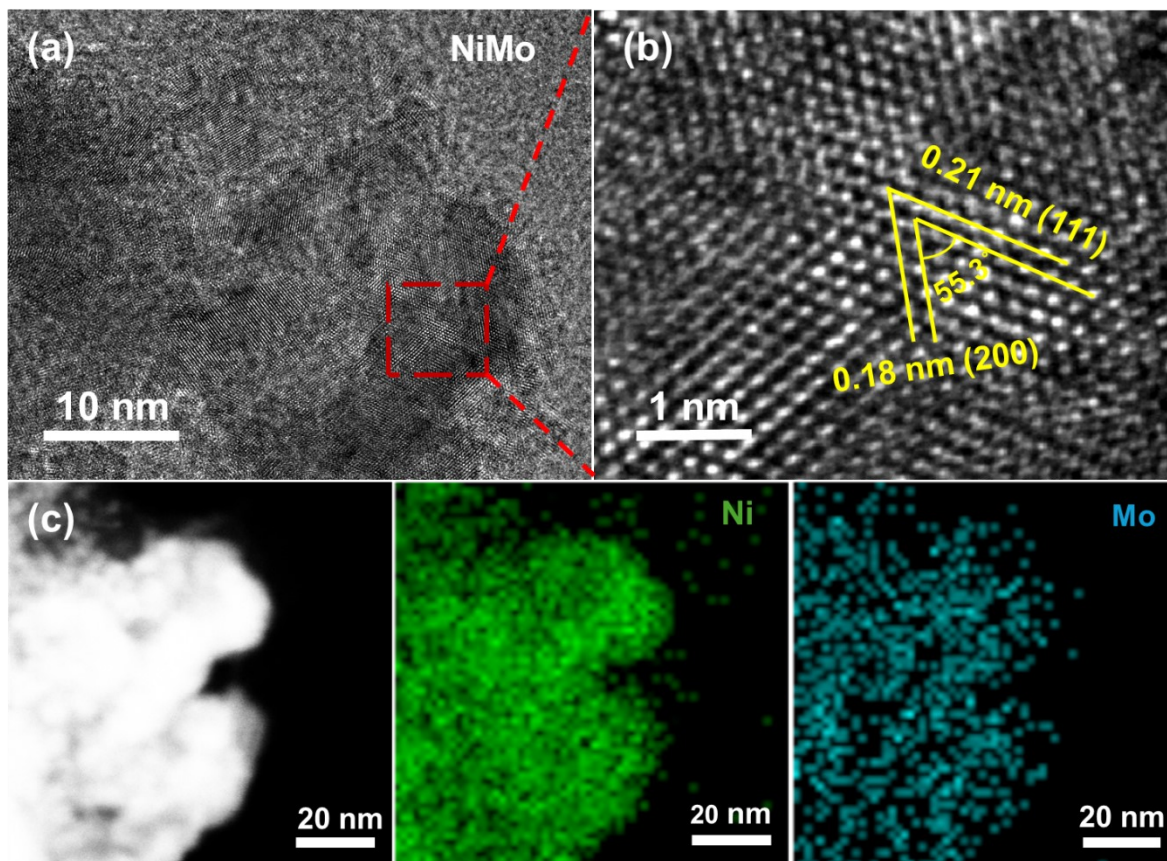

**Figure S4.** (a) HR-TEM image of NiMo. (b) Locally enlarged HRTEM image of NiMo with exposed facets designated. (c) HAADF-STEM image of NiMo with corresponding EDS elemental mapping of Ni and Mo.

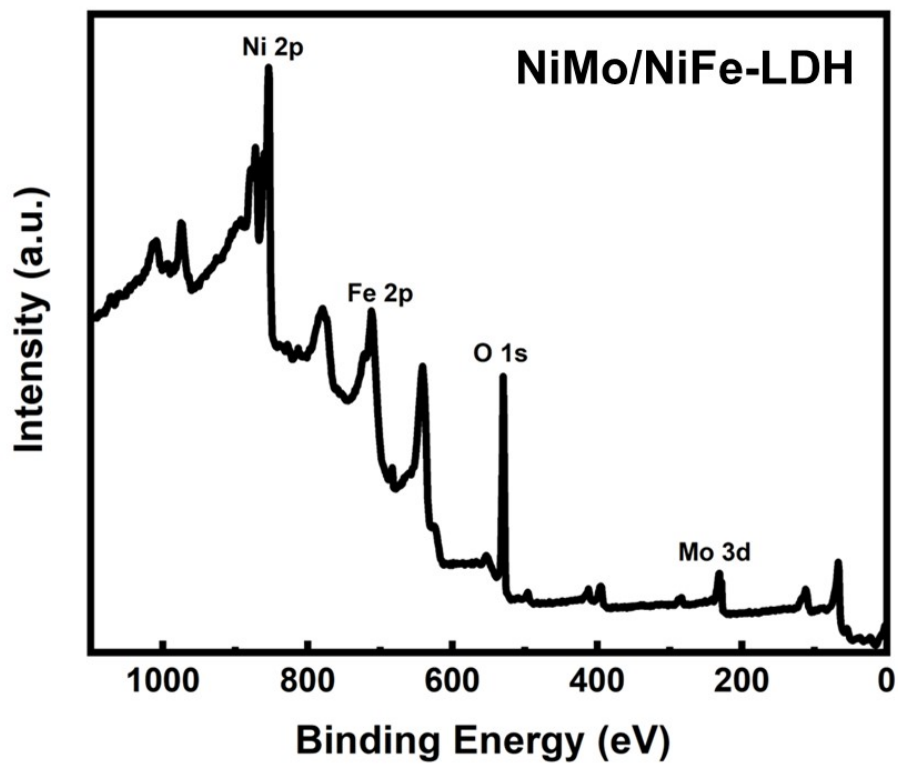

**Figure S5.** XPS survey spectrum of NiMo/NiFe-LDH.

**Table S2.** Binding energies (in eV) of constituent peaks for HRXPS spectra of Ni 2p of NiFe-LDH, NiMo, and NiMo/NiFe-LDH.

| Catalyst      |                      | Ni <sup>0</sup> | Ni <sup>2+</sup> | Ni sat. |
|---------------|----------------------|-----------------|------------------|---------|
| NiFe-LDH      | Ni 2p <sub>3/2</sub> |                 | 855.7            | 861.4   |
|               | Ni 2p <sub>1/2</sub> |                 | 873.5            | 879.7   |
| NiMo          | Ni 2p <sub>3/2</sub> | 853.0           |                  | 859.4   |
|               | Ni 2p <sub>1/2</sub> | 870.2           |                  |         |
| NiMo/NiFe-LDH | Ni 2p <sub>3/2</sub> | 853.3           | 855.5            | 860.4   |
|               | Ni 2p <sub>1/2</sub> | 870.3           | 872.7            | 878.7   |

**Table S3.** Binding energies (in eV) of constituent peaks for HRXPS spectra of Fe 2p of NiFe-LDH and NiMo/NiFe-LDH.

| Catalyst      |                      | Fe <sup>3+</sup> | Fe sat. |
|---------------|----------------------|------------------|---------|
| NiFe-LDH      | Fe 2p <sub>3/2</sub> | 711.1            | 714.0   |
|               | Fe 2p <sub>1/2</sub> | 724.9            |         |
| NiMo/NiFe-LDH | Fe 2p <sub>3/2</sub> | 710.8            | 713.8   |
|               | Fe 2p <sub>1/2</sub> | 723.9            |         |

**Table S4.** Binding energies (in eV) of constituent peaks for HR-XPS spectra of Mo 3d of NiMo and NiMo/NiFe-LDH.

| Catalyst      |                      | Mo <sup>0</sup> | Mo <sup>4+</sup> | Mo <sup>6+</sup> |
|---------------|----------------------|-----------------|------------------|------------------|
| NiMo          | Mo 3d <sub>5/2</sub> | 228.1           | 229.5            | 232.0            |
|               | Mo 3d <sub>3/2</sub> | 231.1           | 233.2            | 235.3            |
| NiMo/NiFe-LDH | Mo 3d <sub>5/2</sub> | 228.3           | 229.7            | 232.1            |
|               | Mo 3d <sub>3/2</sub> | 231.2           | 233.4            | 235.4            |

**Table S5.** Binding energies (in eV) of constituent peaks for HR-XPS spectra of O 1s of NiFe-LDH and NiMo/NiFe-LDH.

| Catalyst      |      | M-O   | OH <sup>-</sup> | H <sub>2</sub> O <sub>(ad)</sub> |
|---------------|------|-------|-----------------|----------------------------------|
| NiFe-LDH      | O 1s | 529.8 | 531.0           | 532.6                            |
| NiMo/NiFe-LDH | O 1s | 529.6 | 531.0           | 532.5                            |

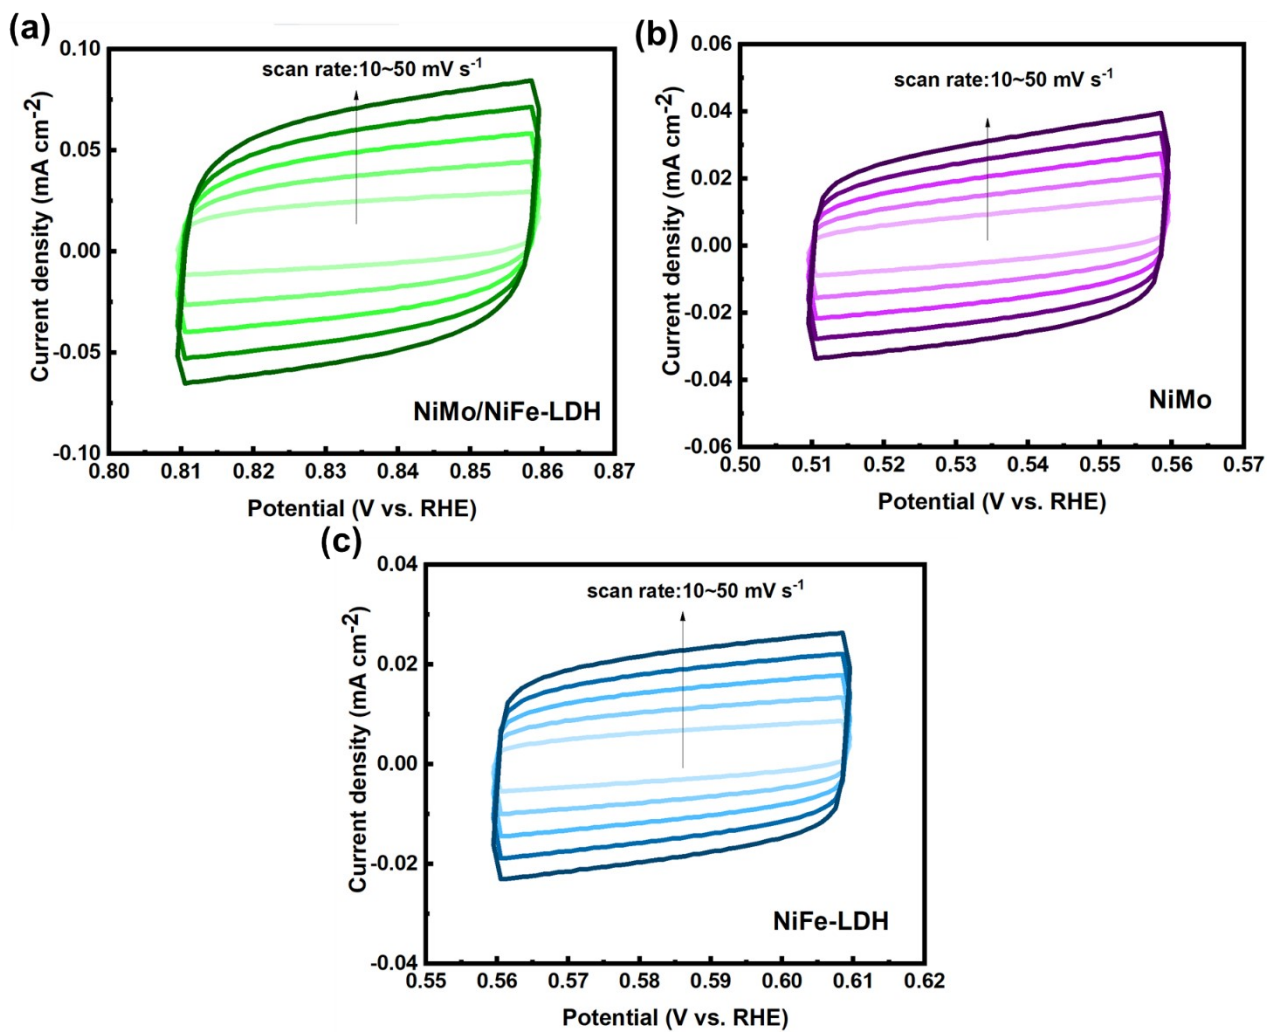

**Figure S6.** CV curves of (a) NiMo/NiFe-LDH, (b) NiMo, and (c) NiFe-LDH in non-Faradaic potential windows recorded at increasing scan rates from 10 to 50 mV s<sup>-1</sup>.

**Table S6.** Fitted  $R_{ct}$  values ( $\Omega$ ) for NiFe-LDH, NiMo, and NiMo/NiFe-LDH under (a) HER (-0.3 V) and (b) OER (1.56 V) conditions.

| <b>HER</b>    |                       | <b>OER</b>    |                       |
|---------------|-----------------------|---------------|-----------------------|
| catalyst      | $R_{ct}$ ( $\Omega$ ) | catalyst      | $R_{ct}$ ( $\Omega$ ) |
| NiMo/NiFe-LDH | 1.72                  | NiMo/NiFe-LDH | 0.42                  |
| NiMo          | 2.48                  | NiMo          | 3.9                   |
| NiFe-LDH      | 4.6                   | NiFe-LDH      | 0.82                  |

**Table S7.** Comparison of HER, OER, and overall water splitting (OWS) performances of NiMo/NiFe-LDH with those of recently reported LDH/ alloy based heterostructured catalysts.

| HER                                   |                                   |                                           | OER                                   |                                   |                                           | OWS<br>$\eta_{10}$<br>(V) | Ref       |
|---------------------------------------|-----------------------------------|-------------------------------------------|---------------------------------------|-----------------------------------|-------------------------------------------|---------------------------|-----------|
| Catalyst                              | Overpotential<br>$\eta_{10}$ (mV) | Tafel<br>slope<br>(mV dec <sup>-1</sup> ) | Catalyst                              | Overpotential<br>$\eta_{10}$ (mV) | Tafel<br>slope<br>(mV dec <sup>-1</sup> ) |                           |           |
| NiMo/NiFe-LDH                         | 40                                | 73                                        | NiMo/NiFe-LDH                         | 190                               | 38                                        | 1.476                     | This work |
| CoNiN@NiFe-LDH                        | 150                               | 169                                       | CoNiN@NiFe-LDH                        | 227                               | 58                                        | 1.63                      | [S1]      |
| NiFe-LDH@NiCoP                        | 120                               | 88                                        | NiFe-LDH@NiCoP                        | 220                               | 49                                        | 1.57                      | [S2]      |
| NiCu@NiFe-LDH                         | 85                                | 92                                        | NiCu@NiFe-LDH                         | 244                               | 51                                        | 1.54                      | [S3]      |
| MoS <sub>2</sub> /NiFe-LDH            | 98                                | 98                                        | MoS <sub>2</sub> /NiFe-LDH            | 257                               | 59                                        | 1.61                      | [S4]      |
| NiMo/NiCo <sub>2</sub> O <sub>4</sub> | 44                                | 61                                        | NiMo/NiCo <sub>2</sub> O <sub>4</sub> | 305                               | 73                                        | 1.54                      | [S5]      |
| NiS/NiMo                              | 77                                | 95                                        | NiS/NiMo                              | 245                               | 87                                        | 1.58                      | [S6]      |
| Cu-NiCo-LDH@CC                        | 73                                | 79                                        | Cu-NiCo-LDH@CC                        | 151                               | 68                                        | 1.51                      | [S7]      |
| NiTe@CoFe-LDH                         | 103                               | 100                                       | NiTe@CoFe-LDH                         | 218                               | 20                                        | 1.56                      | [S8]      |
| CuNi/CoFe-LDH@NF                      | 56                                | 34                                        | CuNi/CoFe-LDH@NF                      | 268( $\eta_{50}$ )                | 63                                        | 1.49                      | [S9]      |

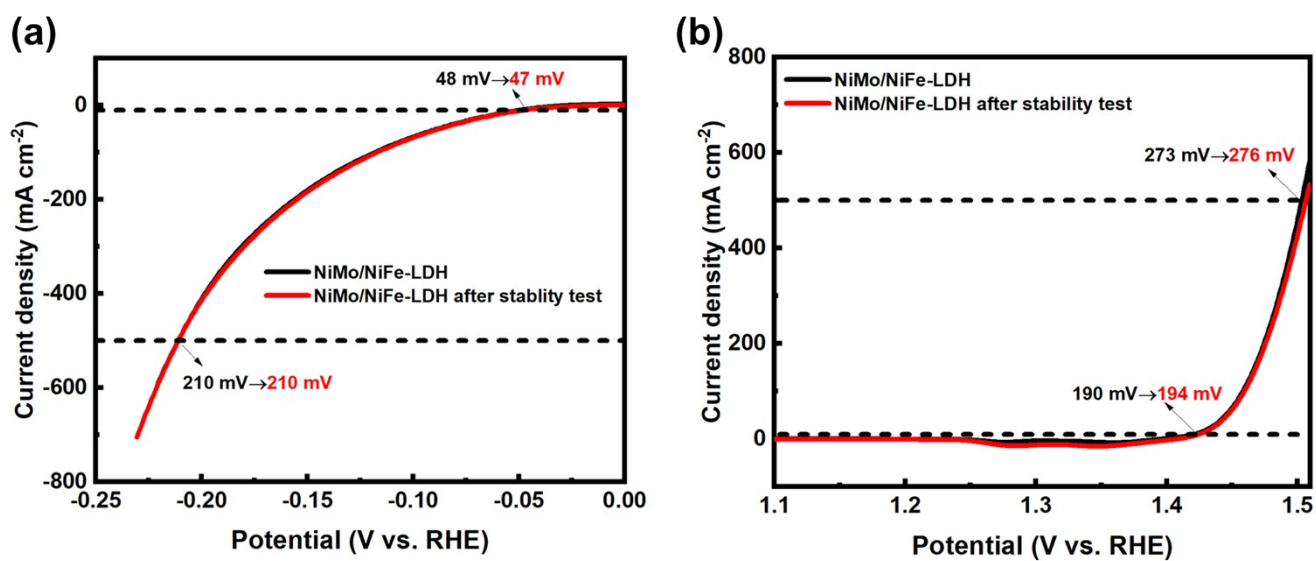

**Figure S7.** Comparison of (a) HER and (b) OER LSV curves before and after long-term stability tests (500 mA cm<sup>-2</sup>, 65 h) for NiMo/NiFe-LDH.

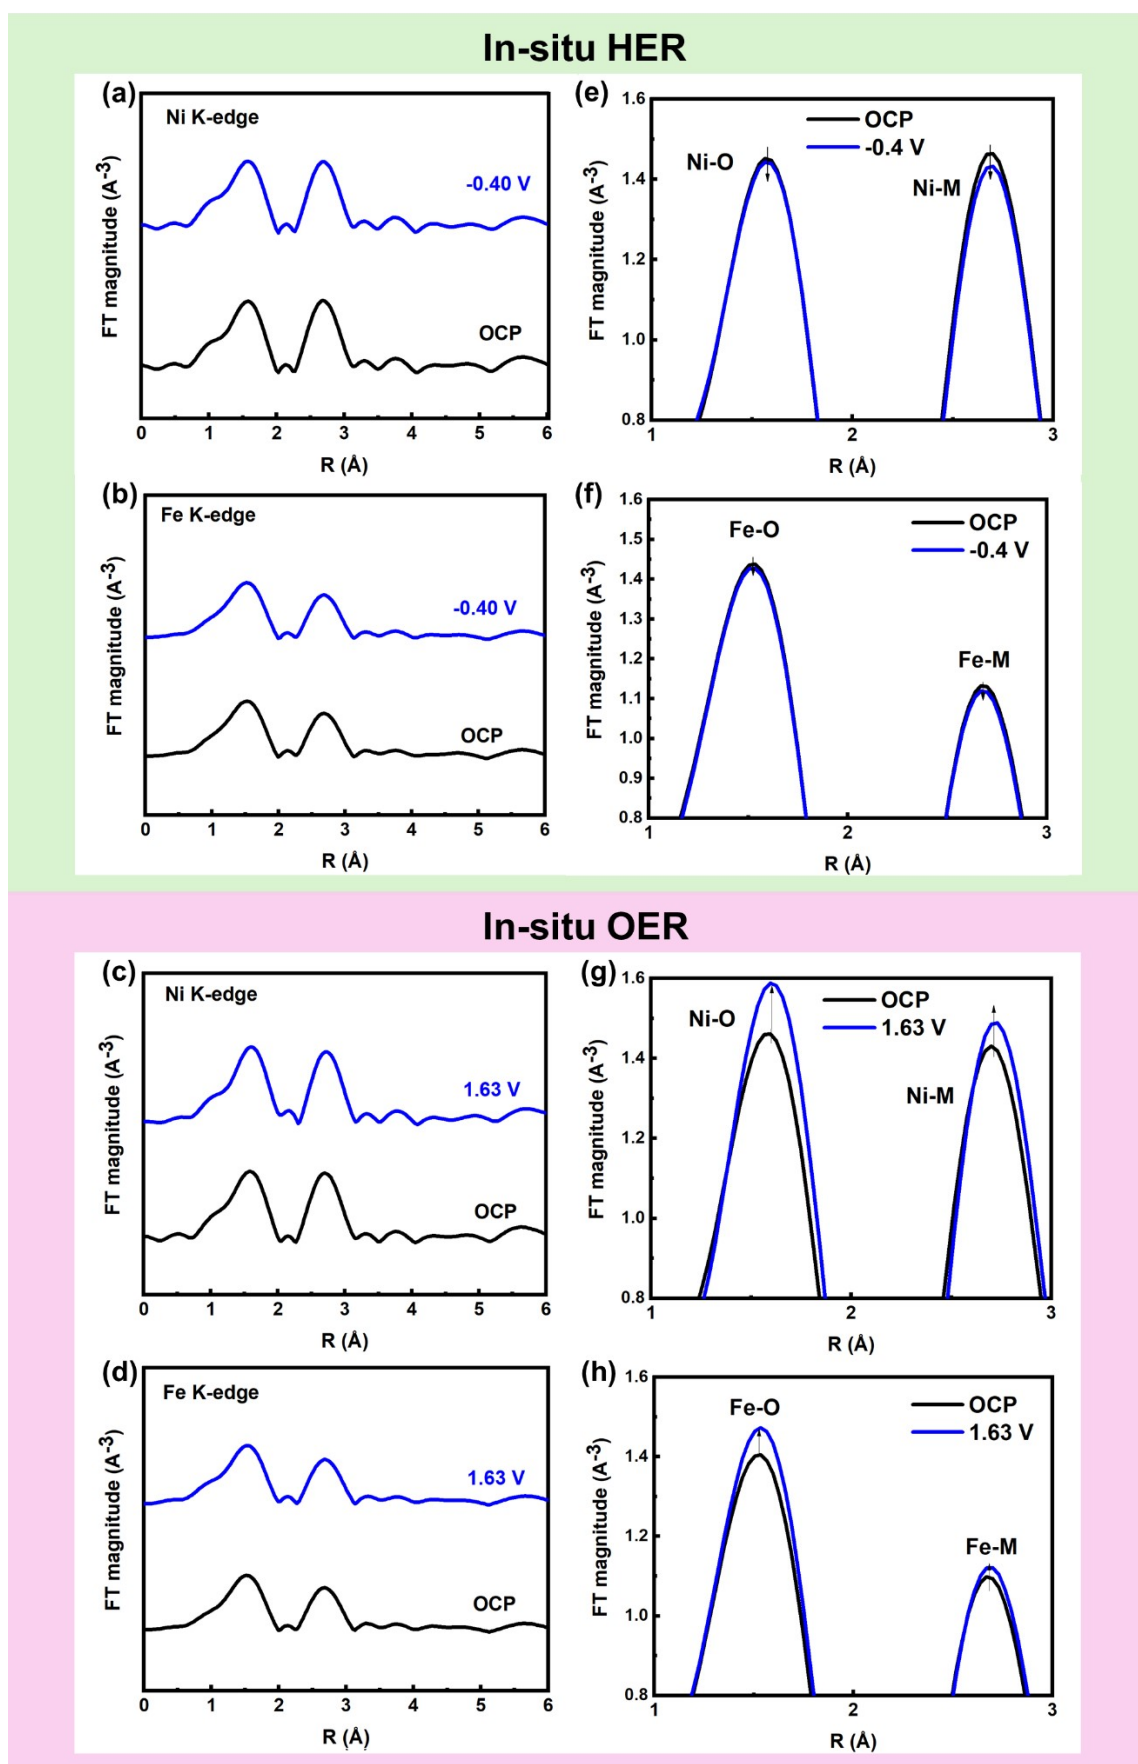

**Figure S8.**  $k^2$ -weighted in-situ FT-EXAFS spectra of NiMo/NiFe-LDH under HER conditions at (a) Ni K-edge and (b) Fe K-edge, and under OER conditions at (c) Ni K-edge and (d) Fe K-edge, with corresponding locally enlarged overlaid curves presented in panels (e), (f), (g), and (h), respectively.

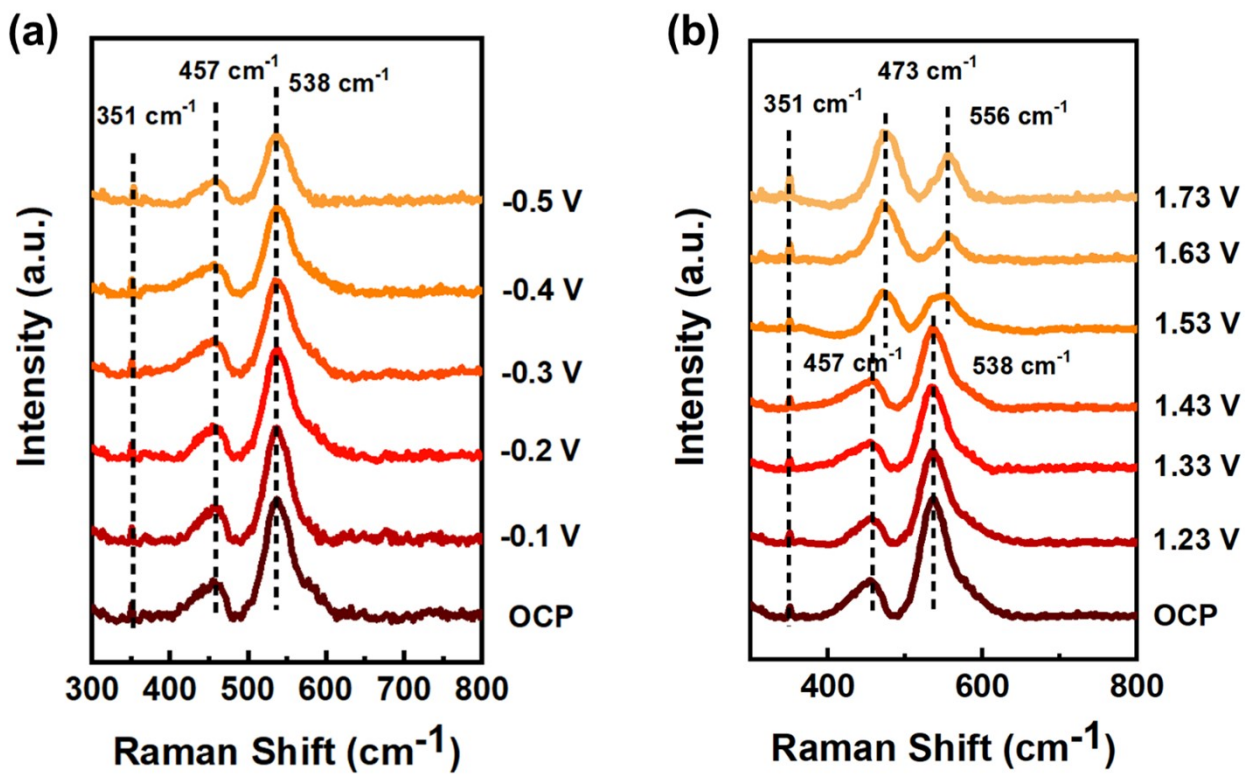

**Figure S9.** In-situ Raman spectra of NiMo/NiFe-LDH under (a) HER conditions and (b) OER conditions.

## References

- [S1] J. Wang, G. Lv, C. Wang, A highly efficient and robust hybrid structure of CoNiN@NiFe LDH for overall water splitting by accelerating hydrogen evolution kinetics on NiFe LDH, *Applied Surface Science* 570 (2021). <https://doi.org/10.1016/j.apsusc.2021.151182>.
- [S2] H. Zhang, X. Li, A. Hähnel, V. Naumann, C. Lin, S. Azimi, S.L. Schweizer, A.W. Maijenburg, R.B. Wehrspohn, Bifunctional Heterostructure Assembly of NiFe LDH Nanosheets on NiCoP Nanowires for Highly Efficient and Stable Overall Water Splitting, *Advanced Functional Materials* 28(14) (2018). <https://doi.org/10.1002/adfm.201706847>.
- [S3] H. Su, J. Jiang, N. Li, Y. Gao, L. Ge, NiCu alloys anchored defect-rich NiFe layered double-hydroxides as efficient electrocatalysts for overall water splitting, *Chemical Engineering Journal* 446 (2022). <https://doi.org/10.1016/j.cej.2022.137226>.
- [S4] X.-P. Li, L.-R. Zheng, S.-J. Liu, T. Ouyang, S. Ye, Z.-Q. Liu, Heterostructures of NiFe LDH hierarchically assembled on MoS<sub>2</sub> nanosheets as high-efficiency electrocatalysts for overall water splitting, *Chinese Chemical Letters* 33(11) (2022) 4761-4765. <https://doi.org/10.1016/j.cclet.2021.12.095>.
- [S5] H. Chen, S. Qiao, J. Yang, X. Du, NiMo/NiCo<sub>2</sub>O<sub>4</sub> as synergy catalyst supported on nickel foam for efficient overall water splitting, *Molecular Catalysis* 518 (2022). <https://doi.org/10.1016/j.mcat.2021.112086>.
- [S6] T. Ren, X. Huang, J. Chen, G. Wang, Y. Liu, F. Bao, W. Guo, Surface-sulphurated nickel–molybdenum alloy film as enhanced electrocatalysts for alkaline overall water splitting, *International Journal of Hydrogen Energy* 57 (2024) 983-989. <https://doi.org/10.1016/j.ijhydene.2024.01.077>.
- [S7] X. Xia, S. Wang, D. Liu, F. Wang, X. Zhang, H. Zhang, X. Yu, Z. Pang, G. Li, C. Chen, Y. Zhao, L. Ji, Q. Xu, X. Zou, X. Lu, Electronic Modulation in Cu Doped NiCo LDH/NiCo Heterostructure for Highly Efficient Overall Water Splitting, *Small* 20(28) (2024) e2311182. <https://doi.org/10.1002/sml.202311182>.
- [S8] L. Yao, R. Li, H. Zhang, M. Humayun, X. Xu, Y. Fu, A. Nikiforov, C. Wang, Interface engineering of NiTe@CoFe LDH for highly efficient overall water-splitting, *International Journal of Hydrogen Energy* 47(76) (2022) 32394-32404. <https://doi.org/10.1016/j.ijhydene.2022.07.135>.
- [S9] D. Wang, Y. Chu, Y. Wu, M. Zhu, L. Pan, R. Li, Y. Chen, W. Wang, N. Mitsuzaki, Z. Chen, Synergistic coupling of a CuNi alloy with a CoFe LDH heterostructure on nickel foam toward high-efficiency overall water splitting, *Journal of Materials Chemistry A* 12(48) (2024) 33680-33688. <https://doi.org/10.1039/d4ta05681g>.
